# Supplementary material for: Preparation and characterization of a TiO2-NT/SnO2–Sb tubular porous electrode with long service lifetime for wastewater treatment process
Source: Royal Society of Chemistry journal article supplement (doi:10.1039/c7ra05127a), 2017-01-01
Supplement: c7ra05127a1.pdf [file c7ra05127a1.pdf]

### Preparation and characterization of TiO<sub>2</sub>-NTs/SnO<sub>2</sub>-Sb tubular porous electrode with long service lifetime for wastewater treatment process

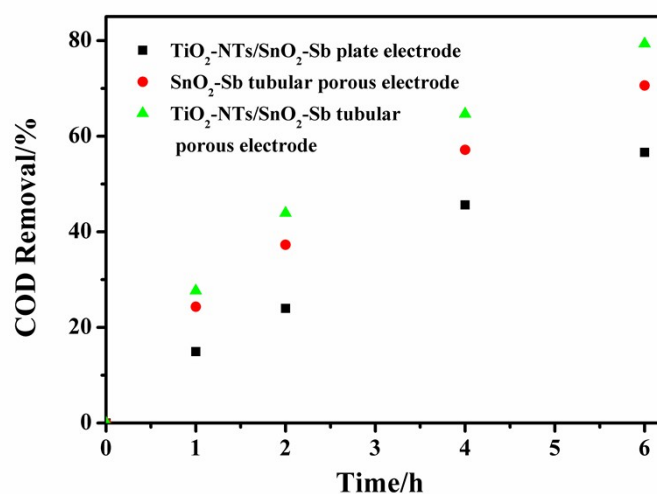

**Fig. S1** COD removal efficiency of pyrimidine by different electrodes as a function of time. Condition: Current density of 10 mA·cm<sup>-2</sup>, pH=6.8, Initial pyrimidine concentration of 100 mg·L<sup>-1</sup>, Flow rate of 0.8 mL·s<sup>-1</sup>.

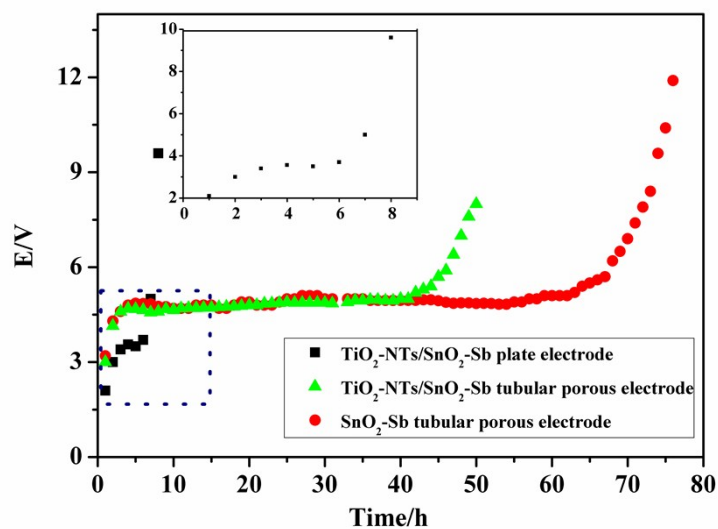

**Fig. S2** The service lifetime test of TiO<sub>2</sub>-NTs/SnO<sub>2</sub>-Sb electrode, SnO<sub>2</sub>-Sb tubular porous electrode, and TiO<sub>2</sub>-NTs/SnO<sub>2</sub>-Sb tubular porous electrode. Condition: Current density of 200 mA·cm<sup>-2</sup>, 0.5 M H<sub>2</sub>SO<sub>4</sub>
